# Supplementary material for: High-temperature superconductivity in transition metallic hydrides MH11(M = Mo, W, Nb, and Ta) under high pressure
Source: Royal Society of Chemistry journal article supplement (doi:10.1039/d0cp06435a), 2021-01-01
Supplement: d0cp06435a1.pdf [file d0cp06435a1.pdf]

## Supplementary Material

### **High-temperature superconductivity in transition metallic hydrides $MH_{11}$ (M=Mo, W, Nb, Ta) under high pressure**

Mingyang Du<sup>1</sup>, Zihan Zhang<sup>1</sup>, Hao Song<sup>1</sup>, Hongyu Yu<sup>1</sup>, Tian Cui<sup>2,1,\*</sup>, Vladimir Z. Kresin<sup>2</sup>, Defang Duan<sup>1,†</sup>

*<sup>1</sup>State Key Laboratory of Superhard Materials, College of Physics, Jilin University, Changchun 130012, People's Republic of China*

*<sup>2</sup>School of Physical Science and Technology, Ningbo University, Ningbo, 315211, People's Republic of China*

*<sup>3</sup>Lawrence Berkeley Laboratory, University of California at Berkeley, Berkeley, CA 94720, USA*

Correspondence author: \*cuitian@jlu.edu.cn, †duandf@jlu.edu.cn

## FIGURES

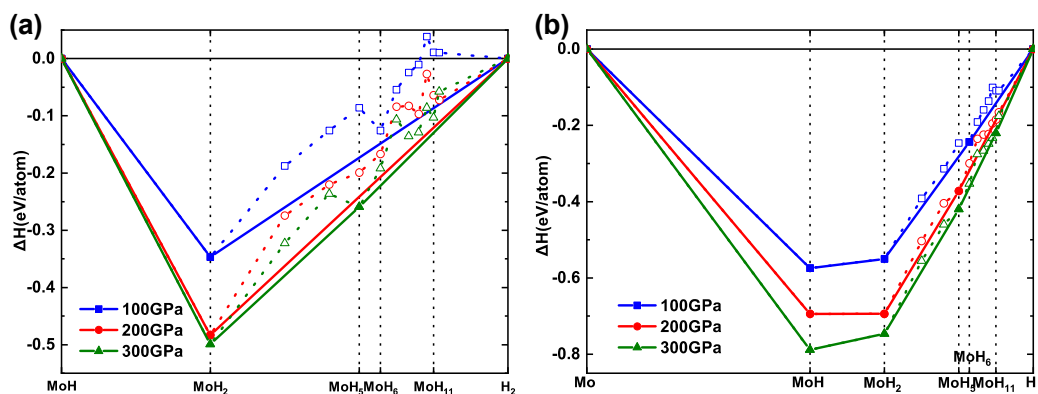

Fig. S1 (a) The convex hull of the Mo-H system relative to MoH and H<sub>2</sub> at 100, 200, 300 GPa without zero-point energy. (b) The convex hull of the Mo-H system relative to Mo<sup>1</sup> and H<sub>2</sub> at 100, 200, 300 GPa with zero-point energy.

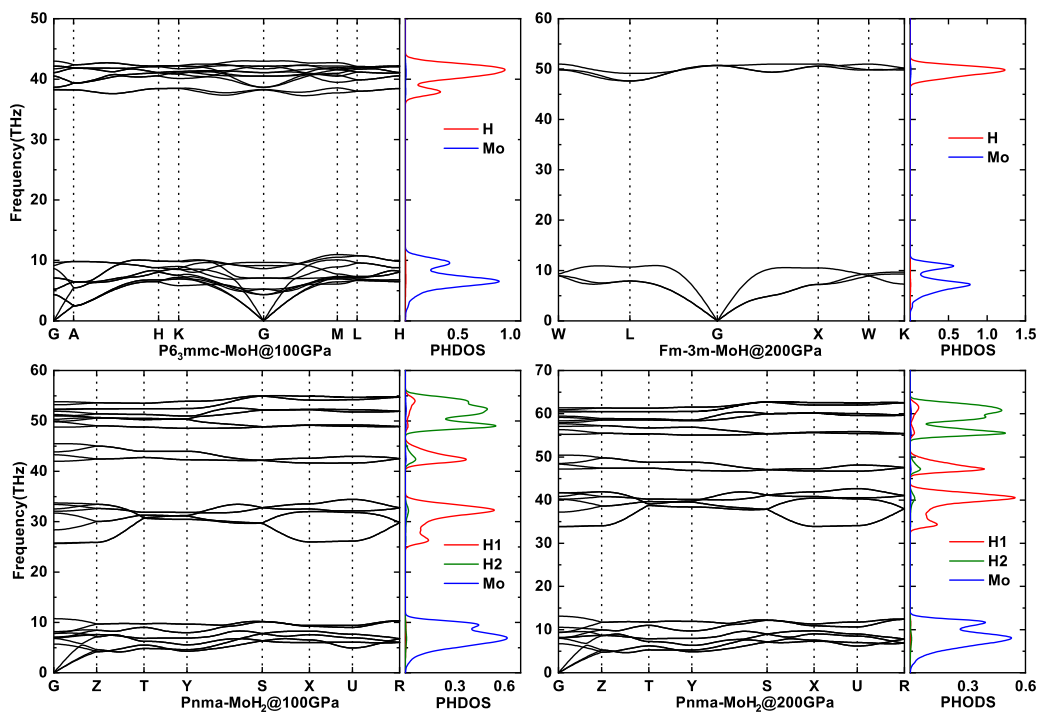

Fig. S2 The phonon band structure and PHDOS of MoH and MoH<sub>2</sub> at different pressures.

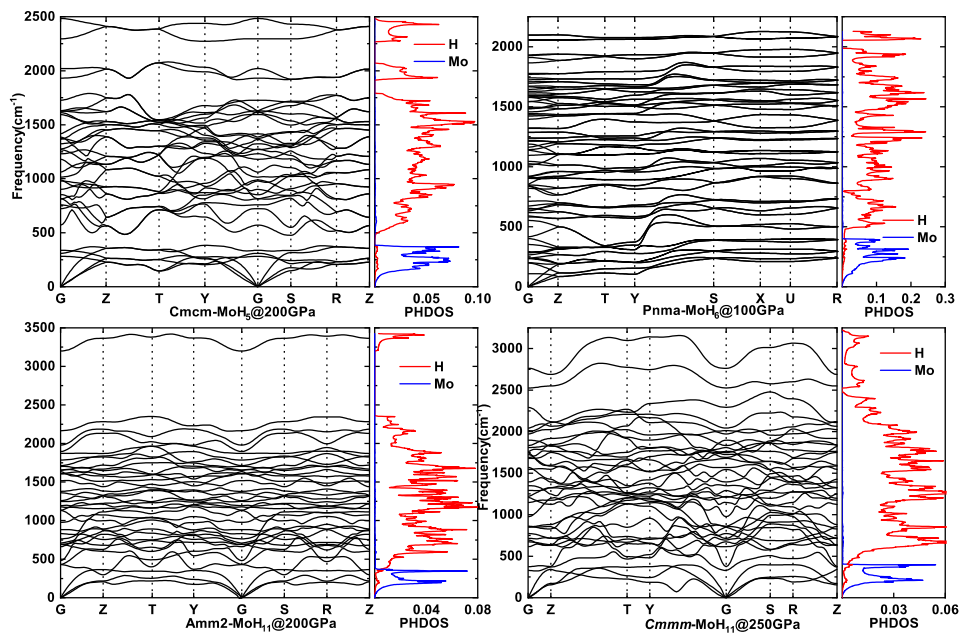

Fig. S3 The phonon band structure and PHDOS of MoH<sub>5</sub>, MoH<sub>6</sub> and MoH<sub>11</sub> at different pressures.

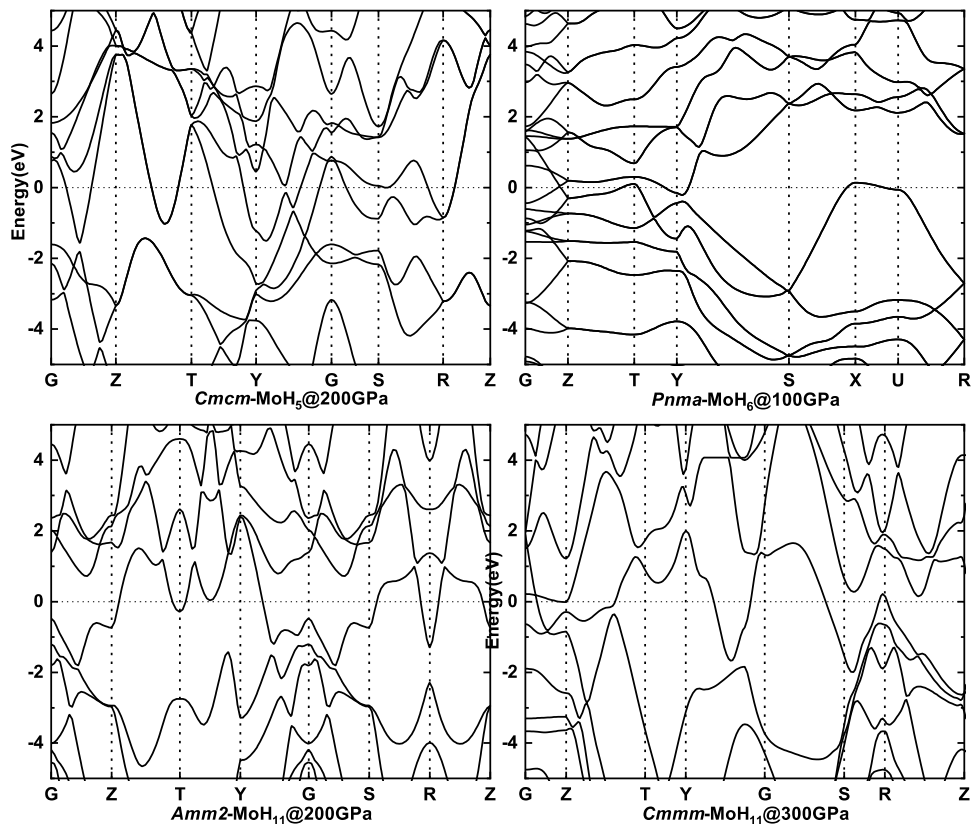

Fig. S4 The electronic band structures of MoH<sub>5</sub>, MoH<sub>6</sub> and MoH<sub>11</sub>.

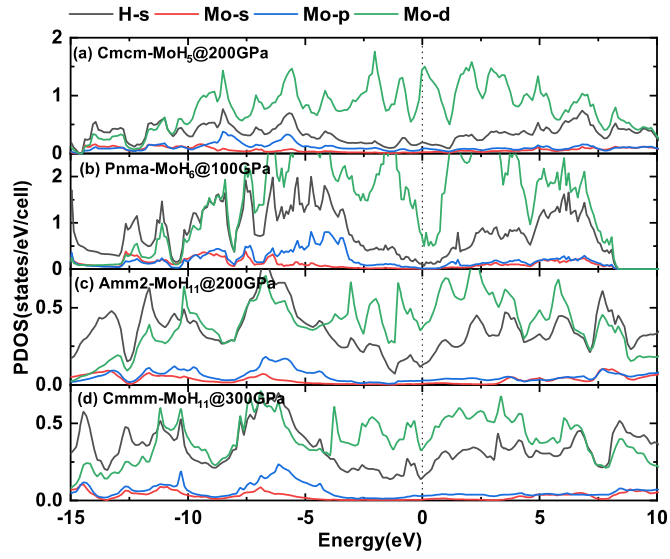

Fig. S5 The projected density of states of MoH<sub>5</sub>, MoH<sub>6</sub> and MoH<sub>11</sub>.

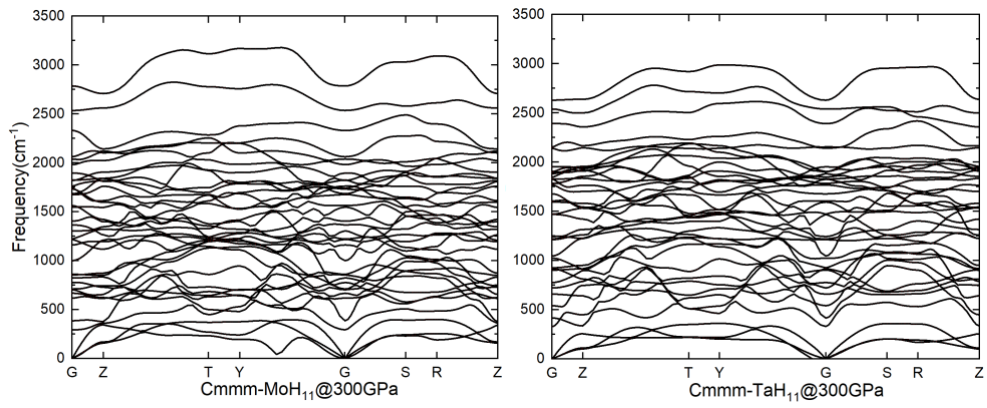

Fig. S6 The phonon band structure of MoH<sub>11</sub> and TaH<sub>11</sub>.

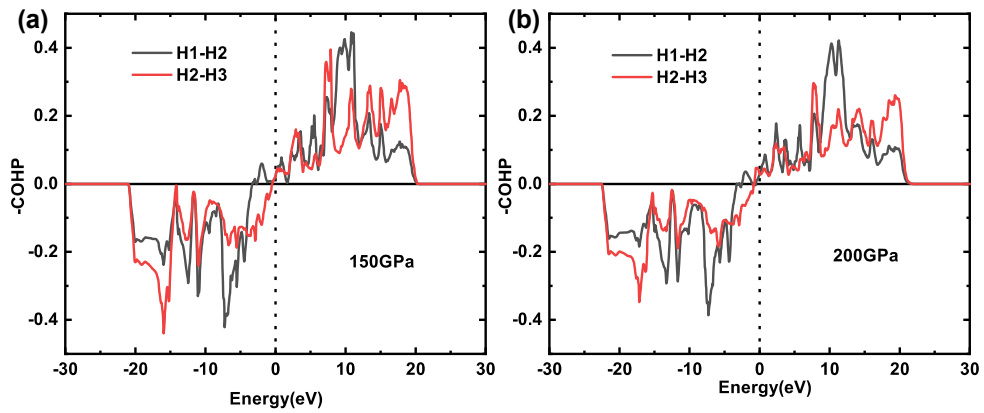

Fig. S7 Crystal orbital Hamilton population (COHP) of H1-H2, and H2-H3 in *Amm2*-MoH<sub>11</sub> at (a) 150GPa and (b) 200GPa.

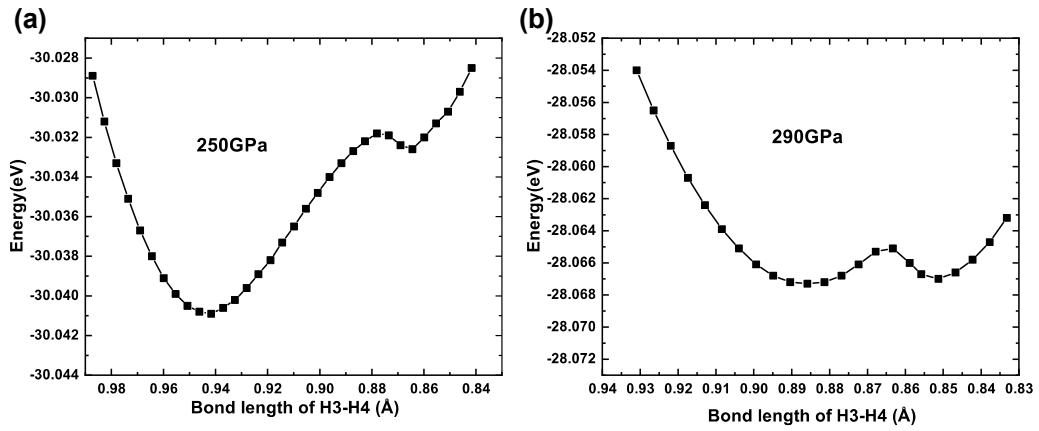

Fig. S8 The total energy of Amm2-Cmmm phase transition at (a) 250GPa and (b) 290GPa.

## TABLES

Table S1 Lattice parameters and atomic positions of MoH, MoH<sub>2</sub>, MoH<sub>5</sub>, MoH<sub>6</sub> and MoH<sub>11</sub>.

| Structure                                  | Parameters<br>(Å, deg)              | Atom | x        | y        | z        |
|--------------------------------------------|-------------------------------------|------|----------|----------|----------|
| <i>P6<sub>3</sub>/mmc</i> MoH<br>(100 GPa) | a=b=2.70290<br>c=4.41530            | H    | 0.00000  | 0.00000  | 0.00000  |
|                                            |                                     | Mo   | 0.33333  | 0.66667  | 0.25000  |
| <i>Fm-3m</i> MoH<br>(100 GPa)              | a=b=c=3.81860                       | H    | 0.50000  | 0.50000  | -0.50000 |
|                                            |                                     | Mo   | 0.00000  | 0.00000  | 0.00000  |
| <i>Pnma</i> MoH <sub>2</sub><br>(100 GPa)  | a=4.51460<br>b=2.83170<br>c=4.95570 | H    | 0.48495  | 0.75000  | 0.78365  |
|                                            |                                     | H    | -0.37410 | 0.25000  | 0.57557  |
|                                            |                                     | Mo   | -0.23585 | 0.75000  | 0.41310  |
| <i>Cmcm</i> MoH <sub>5</sub><br>(200 GPa)  | a=4.57980<br>b=6.13100<br>c=2.66890 | H    | 0.64033  | 0.12905  | 0.75000  |
|                                            |                                     | H    | 0.78877  | 0.06005  | 1.25000  |
|                                            |                                     | H    | 0.50000  | -0.04449 | 0.75000  |
|                                            |                                     | Mo   | 0.50000  | -0.30813 | 0.75000  |
| <i>Pnma</i> MoH <sub>6</sub><br>(100 GPa)  | a=4.76530<br>b=2.81750<br>c=7.41910 | H    | 0.99926  | 0.25000  | 0.12876  |
|                                            |                                     | H    | 0.57195  | 0.25000  | 0.72288  |
|                                            |                                     | H    | 0.61171  | 0.25000  | 0.51024  |
|                                            |                                     | H    | 0.88123  | 0.25000  | 0.60061  |
|                                            |                                     | H    | 0.75075  | 0.75000  | 0.64366  |
|                                            |                                     | H    | 0.18183  | 0.75000  | 0.07088  |
|                                            |                                     | Mo   | 0.37583  | 0.25000  | 0.13906  |
| <i>Amm2</i> MoH <sub>11</sub><br>(200 GPa) | a=4.53180<br>b=2.74420<br>c=4.64280 | H    | 0.20170  | 0.00000  | -0.89077 |
|                                            |                                     | H    | 0.20005  | 0.00000  | -0.18830 |
|                                            |                                     | H    | 0.62854  | 0.00000  | -0.43667 |
|                                            |                                     | H    | 0.63653  | 0.00000  | -0.65084 |
|                                            |                                     | H    | 0.50000  | 0.00000  | -0.81994 |
|                                            |                                     | H    | 0.50000  | 0.00000  | -0.03556 |
|                                            |                                     | H    | 0.50000  | 0.00000  | -0.20437 |
|                                            |                                     | Mo   | 0.00000  | 0.00000  | -0.50951 |
| <i>Cmmm</i> MoH <sub>11</sub><br>(300 GPa) | a=4.51360<br>b=2.58370<br>c=4.37040 | H    | 0.15572  | 0.50000  | 0.78513  |
|                                            |                                     | H    | -0.39151 | 0.50000  | 0.62775  |
|                                            |                                     | H    | 0.18947  | 0.50000  | 0.50000  |
|                                            |                                     | H    | 0.00000  | 0.50000  | 0.50000  |
|                                            |                                     | Mo   | 0.00000  | 0.00000  | 0.00000  |

Table S2 Remnant Charges on H and Mo Atoms Obtained from Bader Charge Analysis of MoH, MoH<sub>2</sub>, MoH<sub>5</sub>, MoH<sub>6</sub> and MoH<sub>11</sub>.

| Structure                                  | Atom | charge | $\sigma$ (e) |
|--------------------------------------------|------|--------|--------------|
| <i>P6<sub>3</sub>/mmc</i> MoH<br>(100 GPa) | H    | 1.3888 | -0.3888      |
|                                            | Mo   | 5.6112 | 0.3888       |
| <i>Fm-3m</i> MoH<br>(100 GPa)              | H    | 1.3892 | -0.3892      |
|                                            | Mo   | 5.6108 | 0.3892       |
| <i>Pnma</i> MoH <sub>2</sub><br>(100 GPa)  | H    | 1.3237 | -0.3237      |
|                                            | H    | 1.3566 | -0.3566      |
|                                            | Mo   | 5.3197 | 0.6803       |
| <i>Cmcm</i> MoH <sub>5</sub><br>(200 GPa)  | H    | 1.1758 | -0.1758      |
|                                            | H    | 1.1790 | -0.1790      |
|                                            | H    | 1.1598 | -0.1598      |
|                                            | H    | 1.1398 | -0.1398      |
|                                            | Mo   | 5.1857 | 0.8143       |
| <i>Pnma</i> MoH <sub>6</sub><br>(100 GPa)  | H    | 1.0629 | -0.0629      |
|                                            | H    | 1.1758 | -0.1758      |
|                                            | H    | 1.1149 | -0.1149      |
|                                            | H    | 1.1827 | -0.1827      |
|                                            | H    | 1.0629 | -0.0629      |
|                                            | H    | 1.1902 | -0.1902      |
|                                            | H    | 1.1899 | -0.1899      |
|                                            | Mo   | 5.0836 | 0.9164       |
| <i>Amm2</i> MoH <sub>11</sub><br>(200 GPa) | H    | 1.1392 | -0.1392      |
|                                            | H    | 1.1289 | -0.1289      |
|                                            | H    | 1.1398 | -0.1398      |
|                                            | H    | 1.0149 | -0.0149      |
|                                            | H    | 1.0745 | -0.0745      |
|                                            | H    | 0.9701 | 0.0299       |
|                                            | H    | 1.0665 | -0.0665      |
|                                            | H    | 1.0820 | -0.0820      |
|                                            | Mo   | 5.1458 | 0.8542       |
| <i>Cmmm</i> MoH <sub>11</sub><br>(300 GPa) | H    | 1.1417 | -0.1417      |
|                                            | H    | 1.0215 | -0.0215      |
|                                            | H    | 1.1038 | -0.1038      |
|                                            | H    | 1.1459 | -0.1459      |
|                                            | H    | 1.0323 | -0.0323      |
|                                            | H    | 0.9935 | 0.0065       |
|                                            | Mo   | 5.1162 | 0.8838       |

$\sigma$  represents the charge transferred from Mo to H.

Table S3. The calculated EPC parameter ( $\lambda$ ), logarithmic average phonon frequency ( $\omega_{\log}$ ), electron density of states at the Fermi level ( $N_{\text{Ef}}$ , states/spin/Ry/Cell), superconducting critical temperature  $T_c$  and  $f_1 f_2 T_c$  using Allen-Dynes modified McMillan equation.

| Phase                          | Pressure (GPa) | $\lambda$ | $\omega_{\log}$ (K) | $N_{\text{Ef}}$ | $T_c$ (K) | $f_1 f_2 T_c$ (K) |
|--------------------------------|----------------|-----------|---------------------|-----------------|-----------|-------------------|
| <i>Cmcm</i> -MoH <sub>5</sub>  | 150            | 1.68      | 577                 | 10.75           | 67-72     | 77-86             |
|                                | 200            | 1.45      | 729                 | 10.15           | 73-80     | 82-91             |
|                                | 250            | 1.36      | 824                 | 9.73            | 77-85     | 85-96             |
|                                | 300            | 1.34      | 880                 | 9.40            | 80-89     | 88-100            |
| <i>Pnma</i> -MoH <sub>6</sub>  | 100            | 0.86      | 503                 | 9.44            | 22-27     | 24-29             |
| <i>Amm2</i> -MoH <sub>11</sub> | 200            | 1.59      | 794                 | 5.93            | 87-95     | 100-111           |
|                                | 250            | 1.75      | 861                 | 6.38            | 103-112   | 121-134           |
| <i>Cmmm</i> -MoH <sub>11</sub> | 250            | 1.54      | 1004                | 6.11            | 107-117   | 121-135           |

the Coulomb pseudopotential  $\mu^* = 0.10$  and  $0.13$ .

Table S4. The calculated EPC parameter ( $\lambda$ ), logarithmic average phonon frequency ( $\omega_{\log}$ ), electron density of states at the Fermi level ( $N_{\text{Ef}}$ , states/spin/Ry/Cell), the contribution of H atoms DOS to the total DOS at the Fermi energy ( $P_{\text{H}}$ ), superconducting critical temperature  $T_c$  and  $f_1 f_2 T_c$  using Allen-Dynes modified McMillan equation and  $T_c^{\text{scE}}$  using the Self-consistent solution of the Eliashberg equation.

| Phase                          | Pressure (GPa) | $\lambda$ | $\omega_{\log}$ (K) | $N_{\text{Ef}}$ | $P_{\text{H}}$ (%) | $T_c$ (K) | $f_1 f_2 T_c$ (K) | $T_c^{\text{scE}}$ (K) |
|--------------------------------|----------------|-----------|---------------------|-----------------|--------------------|-----------|-------------------|------------------------|
| <i>Cmmm</i> -MoH <sub>11</sub> | 300            | 1.52      | 1002                | 5.96            | 24.5               | 105-115   | 118-132           | 134-148                |
| <i>Cmmm</i> -WH <sub>11</sub>  | 300            | 1.57      | 957                 | 5.80            | 28.6               | 106-116   | 121-135           | 135-151                |
| <i>Cmmm</i> -NbH <sub>11</sub> | 300            | 1.09      | 1280                | 5.23            | 22.8               | 89-102    | 96-111            | 101-116                |
| <i>Cmmm</i> -TaH <sub>11</sub> | 300            | 1.18      | 1257                | 5.02            | 28.7               | 91-104    | 99-114            | 107-122                |

the Coulomb pseudopotential  $\mu^* = 0.10$  and  $0.13$ .



Table S5. The strength of the interaction of electrons with optical phonons  $\lambda_{\text{opt}}$  and acoustic phonons  $\lambda_{\text{ac}}$  for each of these regions and the corresponding average frequencies  $\omega_{\text{opt}}$  and  $\omega_{\text{ac}}$ , isotope coefficients  $\alpha$ , the critical temperature upon the substitution of deuterium for hydrogen  $T_c^{\text{D}}$  and  $T_c^{\text{GK}}$  calculated by the G-K equation.

| Phase                          | Pressure (GPa) | $\lambda_{\text{opt}}$ | $\lambda_{\text{ac}}$ | $\Omega_{\text{opt}}$ | $\Omega_{\text{ac}}$ | $\alpha$ | $T_c^{\text{D}}$ | $T_c^{\text{GK}}$ (K) |
|--------------------------------|----------------|------------------------|-----------------------|-----------------------|----------------------|----------|------------------|-----------------------|
| <i>Cmmm</i> -MoH <sub>11</sub> | 300            | 1.09                   | 0.4                   | 1949                  | 347                  | 0.36     | 124-137          | 160-177               |
| <i>Cmmm</i> -WH <sub>11</sub>  | 300            | 1.19                   | 0.36                  | 1820                  | 280                  | 0.39     | 116-129          | 152-168               |
| <i>Cmmm</i> -NbH <sub>11</sub> | 300            | 0.85                   | 0.24                  | 2128                  | 472                  | 0.39     | 89-104           | 117-137               |
| <i>Cmmm</i> -TaH <sub>11</sub> | 300            | 0.91                   | 0.21                  | 2102                  | 386                  | 0.41     | 91-105           | 121-139               |

the Coulomb pseudopotential  $\mu^* = 0.10$  and  $0.13$ .

## Equations for calculating $T_c$ and related parameters

### (1) Gor'kov-Kresin equation

In the study of hydrides, in order to explore the behavior of hydrogen atoms, Lev P. Gor'kov and Vladimir Z. Kresin divided the electroacoustic interaction into two parts according to the acoustic branch and the optical branch<sup>2</sup>:

$$\lambda_{ac} = 2 \int_0^{\omega_1} \frac{\alpha^2 F(\omega)}{\omega} d\omega \quad (1)$$

$$\lambda_{opt} = 2 \int_{\omega_1}^{\infty} \frac{\alpha^2 F(\omega)}{\omega} d\omega \quad (2)$$

$$\langle \omega_{ac}^2 \rangle = \frac{2}{\lambda_{ac}} \int_0^{\omega_1} d\omega \cdot \omega^2 \frac{\alpha^2 F(\omega)}{\omega} = \frac{2}{\lambda_{ac}} \int_0^{\omega_1} \alpha^2 F(\omega) \omega d\omega \quad (3)$$

$$\langle \omega_{opt}^2 \rangle = \frac{2}{\lambda_{opt}} \int_{\omega_1}^{\infty} d\omega \cdot \omega^2 \frac{\alpha^2 F(\omega)}{\omega} = \frac{2}{\lambda_{opt}} \int_{\omega_1}^{\infty} \alpha^2 F(\omega) \omega d\omega \quad (4)$$

$T_c$  is written as

$$T_c = T_c^{opt} + \Delta T_c^{ac} \quad (5)$$

$$T_c^0 \equiv T_c^{opt} \quad (6)$$

When  $\lambda_{ac} \ll \lambda_{opt}$ , we can obtain the following analytical expression for the critical temperature of the high- $T_c$  phase:

$$T_c = \left[ 1 + 2 \frac{\lambda_{ac}}{\lambda_{opt} - \mu^*} \cdot \frac{1}{1 + \eta^{-2}} \right] T_c^0 \quad (7)$$

$$\eta = \frac{\tilde{\omega}_{ac}}{\pi T_c^0} \quad (8)$$

When  $\lambda_{opt} \leq 1.5$ , we can use the McMillan-Dynes expression for  $T_c^0$ :

$$T_c^0 = \frac{\tilde{\omega}_{opt}}{1.2} \exp \left[ - \frac{1.04(1 + \lambda_{opt})}{\lambda_{opt} - \mu^*(1 + 0.62\lambda_{opt})} \right] \quad (9)$$

When  $\lambda_{opt} > 1.5$ , another option is to use the analytical expression, valid for any value of the coupling constant:

$$T_c^0 = \frac{0.25 \tilde{\omega}_{opt}}{\left[ e^{\lambda_{eff}} - 1 \right]^{\frac{1}{2}}} \quad (10)$$

$$\lambda_{eff} = (\lambda_{opt} - \mu^*) \left[ 1 + 2\mu^* + \lambda_{opt} \mu^* t(\lambda_{opt}) \right]^{-1} \quad (11)$$

$$t(x) = 1.5 \exp(-0.28x) \quad (12)$$

In the case  $T_c < \tilde{\omega}_{ac} \ll \tilde{\omega}_{opt}$ , one can estimate  $T_c$  with:

$$T_c \approx \tilde{\omega}_{opt} \frac{\lambda_{opt}}{\lambda} \tilde{\omega}_{ac} \frac{\lambda_{ac}}{\lambda} \exp \left( - \frac{1 + \lambda}{\lambda - \mu^*} \right) \quad (13)$$

The value of the isotope coefficient  $\alpha$  in the high- $T_c$  phase can be calculated with the use of

$$\alpha = \frac{1}{2} \left[ 1 - 4 \frac{\lambda_{ac}}{\lambda_{opt}} \frac{\eta^2}{(\eta^2 + 1)^2} \right] \quad (14)$$

The critical temperature value after isotope replacement  $T_c^D$  can be calculated by

$$\frac{T_c}{T_c^D} = \left(\frac{M_H}{M_D}\right)^{-\alpha} \quad (15)$$

## (2) The Allen–Dynes-modified McMillan equation

$T_c$  can be estimated by the McMillan equation<sup>3</sup>:

$$T_c = \frac{\omega_{log}}{1.2} \exp\left[-\frac{1.04(1+\lambda)}{\lambda-\mu^*(1+0.62\lambda)}\right] \quad (16)$$

where  $\lambda$  and  $\omega_{log}$  are the electron–phonon coupling constant and the logarithmic-averaged phonon frequency, respectively, and  $\mu^*$  is the Coulomb pseudopotential, for which we use the widely accepted range of 0.1-0.13.  $\lambda$  and  $\omega_{log}$  are given by

$$\lambda = 2 \int_0^\infty \frac{\alpha^2 F(\omega)}{\omega} d\omega \quad (17)$$

and

$$\omega_{log} = \exp\left(\frac{2}{\lambda} \int_0^\infty \frac{d\omega}{\omega} \alpha^2 F(\omega) \ln \omega\right) \quad (18)$$

The parameter  $\omega$  denotes the phonon frequency, and  $\alpha^2 F(\omega)$  is the Eliashberg spectral function

$$\alpha^2 F(\omega) = \frac{1}{2\pi N(\varepsilon_F)} \sum_{qv} \frac{\gamma_{qv}}{\omega_{qv}} \delta(\omega - \omega_{qv}) \quad (19)$$

The line width  $\gamma_{qv}$  is written as

$$\gamma_{qv} = \pi \omega_{qv} \sum_{mn} \sum_k |g_{mn}^v(\mathbf{k}, \mathbf{q})|^2 \delta(\varepsilon_{m, \mathbf{k}+\mathbf{q}} - \varepsilon_F) \times \delta(\varepsilon_{n, \mathbf{k}} - \varepsilon_F) \quad (20)$$

where  $\varepsilon_{n, \mathbf{k}}$  is the energy of the bare electronic Bloch state,  $\varepsilon_F$  is the Fermi energy, and  $g_{mn}^v(\mathbf{k}, \mathbf{q})$  is the electron–phonon matrix element.

When the value of  $\lambda$  larger than 1.3, strong-coupling corrections begin to appear. Therefore, P. B. Allen and R. C. Dynes use two separate correction factors ( $f_1$  and  $f_2$ ) to describe these two effects. Then we can further obtain the Allen–Dynes-modified McMillan equation<sup>4</sup>:

$$T_c = \frac{f_1 f_2 \omega_{log}}{1.2} \exp\left[-\frac{1.04(1+\lambda)}{\lambda-\mu^*(1+0.62\lambda)}\right] \quad (21)$$

$f_1$  and  $f_2$  are given by

$$f_1 = \sqrt[3]{\left[1 + \left(\frac{\lambda}{2.46(1+3.8\mu^*)}\right)^{\frac{3}{2}}\right]} \quad (22)$$

and

$$f_2 = 1 + \frac{\left(\frac{\bar{\omega}_2}{\omega_{log}} - 1\right) \lambda^2}{\lambda^2 + \left[1.82(1+6.3\mu^*) \frac{\bar{\omega}_2}{\omega_{log}}\right]} \quad (23)$$

average frequencies  $\bar{\omega}_2$  is given by

$$\bar{\omega}_2 = \sqrt{\frac{2}{\lambda} \int_0^\infty \frac{d\omega}{\omega} \alpha^2 F(\omega) \omega d\omega} \quad (24)$$

## (3) Self-consistent solution of the Eliashberg equation

For strong-coupling system, it can be better described with Eliashberg equation<sup>5</sup>:

$$Z(i\omega_n)\Delta(i\omega_n) = \frac{\pi T}{N_F} \sum_{n'} \frac{\Delta(i\omega'_n)}{\sqrt{\omega_n'^2 + \Delta^2(i\omega'_n)}} \times [\lambda(\omega_n - \omega_{n'}) - N_F \mu^*] \delta(\epsilon) \quad (25)$$

$$Z(i\omega_n) = 1 + \frac{\pi T}{N_F \omega_n} \sum_{n'} \frac{\omega'_n}{\sqrt{\omega_n'^2 + \Delta^2(i\omega'_n)}} \lambda(\omega_n - \omega_{n'}) \delta(\epsilon) \quad (26)$$

where functions  $Z(i\omega_n)$  and  $\Delta(i\omega_n)$  are the renormalization function and pairing order parameter, respectively.  $N_F$  is the density of electronic states at the Fermi level, and  $\delta(\epsilon)$  is the Dirac delta function.  $i\omega_n = i(2n + 1)\pi T_c$  are the fermion Matsubara frequencies.  $\mu^*$  is the Coulomb pseudopotential, for which we use the widely accepted range of 0.1-0.13.  $\lambda(\omega_n - \omega_{n'})$  contains the electron-phonon coupling matrix, phonon propagator, and the phonon density of states, and is given by:

$$\lambda(\omega_n - \omega_{n'}) = \int_0^\infty d\omega \frac{2\omega}{(\omega_n - \omega'_n)^2 + \omega^2} \alpha^2 F(\omega) \quad (27)$$

The equations for the  $Z(i\omega_n)$  and  $\Delta(i\omega_n)$  form a coupled nonlinear system and are solved self-consistently. We evaluated renormalization function and the order parameter for each Matsubara frequency along the imaginary energy axis. After calculating  $Z(i\omega_n)$  and  $\Delta(i\omega_n)$ , an analytic continuation is performed to the real axis using Pade' functions.

The specific process is as follows:

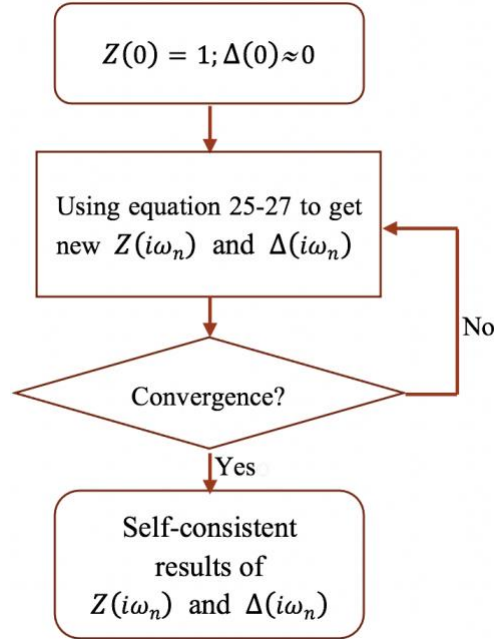

## References

1. J. Zhou, N. S. Xu, S. Z. Deng, J. Chen, J. C. She and Z. L. Wang, *Adv. Mater.*, 2003, **15**, 1835-1840.
2. L. P. Gor'kov and V. Z. Kresin, *Rev. Mod. Phys.*, 2018, **90**, 16.
3. W. L. McMillan, *Physical Review*, 1968, **167**, 331.
4. P. B. Allen and R. C. Dynes, *Phys. Rev. B*, 1975, **12**, 905-922.
5. G. M. Eliashberg, *Sov Phys JETP*, 1960, **11:3**, 696-702.
